# Supplementary material for: Open-access and multi-directional electroosmotic flow chip for positioning heterotypic cells
Source: Royal Society of Chemistry journal article supplement (doi:10.1039/c0lc00634c), 2011-01-01
Supplement: c0lc00634c.pdf [file c0lc00634c.pdf]

Video file:

MovieS1.wmv (4.6MB)

Title:

Control of EOF direction

Caption:

The control of 8 directions—one for every 45° rotation—was demonstrated with 4 electrodes (N, E, S and W). The flow is visualized by fluorescent beads ( $\phi = 1\ \mu\text{m}$ ). scale bar = 200  $\mu\text{m}$

Keywords:

Electroosmotic flow, Flow control, Open-access chip, Multi direction, Flow visualization

---

Video file:

MovieS2.wmv (2.0MB)

Title:

Heterotypic cell positioning

Caption:

NIH3T3 cells are trapped successively at the pocket-like microstructures by electroosmotic flow

Keywords:

Cell trapping, Cell positioning, Electroosmotic flow, Heterotypic cell, Micro-pocket
